# Supplementary material
Source: publisher site journal article supplement (https://www.spandidos-publications.com/3942/downloadSupplementary)
Supplement: Supplementary file 1 [file downloadSupplementary]

Video S1. Lymphangiography video images. The video images indicated that contrast enhancement of the lymphatic ducts along the iliac chains on both sides occurred at a slow rate. The epithelial layer was not intact according to the lymphangiography images.
